# Supplementary material for: MicroRNA-21 as a potential biomarker for detecting esophageal carcinoma in Asian populations: a meta-analysis
Source: PeerJ. 2022 Sep 30;10:e14048. doi: 10.7717/peerj.14048 (PMC9528905; doi:10.7717/peerj.14048)
Supplement: Supplemental Information 1 [file peerj-10-14048-s001.xlsx]

## Sheet: Sheet1
First author	Year	TP	FP	FN	TN
Guiying Sun	2019	76.25	12.5	48.75	112.5
Wen-Tao Wang (a)	2019	102.4	12.8565	25.6	32.1435
Wen-Tao Wang (b)	2019	85.7856	9.2655	42.2144	35.7345
Wen-Tao Wang (c)	2019	103.488	13.5	24.512	31.5
Hadiseh Samiei	2019	26.4452	11.7708	7.5548	22.2292
Lu Zhang	2018	92.5	27.5	32.5	97.5
Kai Wang	2018	27.09	5.472	7.91	26.528
Priyanka Sharma	2017	19.9992	8.9985	4.0008	12.0015
Shuhei Komatsu	2016	20.054	1.14	16.946	18.86
Zijun Xie	2013	34.983	9.994	4.017	9.006
Zi-Jun Xie	2012	28	6	4	10
Bing Wang	2012	22.01	12.012	8.99	26.988
Junji Kurashige	2012	33.015	2	37.985	39
S Komatsu	2011	44	6	6	14
Plasma
First author	Year	TP	FP	FN	TN
Guiying Sun	2019	76.25	12.5	48.75	112.5
Wen-Tao Wang (a)	2019	102.4	12.8565	25.6	32.1435
Wen-Tao Wang (b)	2019	85.7856	9.2655	42.2144	35.7345
Wen-Tao Wang (c)	2019	103.488	13.5	24.512	31.5
Hadiseh Samiei	2019	26.4452	11.7708	7.5548	22.2292
Shuhei Komatsu	2016	20.054	1.14	16.946	18.86
S Komatsu	2011	44	6	6	14
blood
First author	Year	TP	FP	FN	TN
Lu Zhang	2018	92.5	27.5	32.5	97.5
Priyanka Sharma	2017	19.9992	8.9985	4.0008	12.0015
serum
First author	Year	TP	FP	FN	TN
Kai Wang	2018	27.09	5.472	7.91	26.528
Bing Wang	2012	22.01	12.012	8.99	26.988
Junji Kurashige	2012	33.015	0	37.985	39
saliva
First author	Year	TP	FP	FN	TN
Zijun Xie	2013	34.983	9.994	4.017	9.006
Zi-Jun Xie	2012	28	6	4	10
