# Supplementary material for: MicroRNA-21 as a potential biomarker for detecting esophageal carcinoma in Asian populations: a meta-analysis
Source: PeerJ. 2022 Sep 30;10:e14048. doi: 10.7717/peerj.14048 (PMC9528905; doi:10.7717/peerj.14048)
Supplement: Supplemental Information 2 [file peerj-10-14048-s002.xlsx]

## Sheet: Sheet1
Author	Studyld	TP	FP	FN	TN
ALL
Guiying Sun	1	76.25	12.5	48.75	112.5
Wen-Tao Wang (a)	2	102.4	12.8565	25.6	32.1435
Wen-Tao Wang (b)	3	85.7856	9.2655	42.2144	35.7345
Wen-Tao Wang (c)	4	103.488	13.5	24.512	31.5
Hadiseh Samiei	5	26.4452	11.7708	7.5548	22.2292
Lu Zhang	6	92.5	27.5	32.5	97.5
Kai Wang	7	27.09	5.472	7.91	26.528
Priyanka Sharma	8	19.9992	8.9985	4.0008	12.0015
Shuhei Komatsu	9	20.054	1.14	16.946	18.86
Zijun Xie	10	34.983	9.994	4.017	9.006
Zi-Jun Xie	11	28	6	4	10
Bing Wang	12	22.01	12.012	8.99	26.988
Junji Kurashige	13	33.015	0	37.985	39
S Komatsu	14	44	6	6	14
blood
Lu Zhang	1	92.5	27.5	32.5	97.5
Priyanka Sharma	2	19.9992	8.9985	4.0008	12.0015
serum
Kai Wang	1	27.09	5.472	7.91	26.528
Bing Wang	2	22.01	12.012	8.99	26.988
Junji Kurashige	3	33.015	2	37.985	39
saliva
Zijun Xie	1	34.983	9.994	4.017	9.006
Zi-Jun Xie	2	28	6	4	10
